# Supplementary material for: Effects of electrochemical reaction and surface morphology on electroactive surface area of porous copper manufactured by Lost Carbonate Sintering
Source: Royal Society of Chemistry journal article supplement (doi:10.1039/c7ra04204c), 2017-01-01
Supplement: c7ra04204c1.pdf [file c7ra04204c1.pdf]

**Effects of electrochemical reaction and surface morphology on electroactive  
surface area of porous copper manufactured by Lost Carbonate Sintering**

**Supplementary Information**

Pengcheng Zhu\* and Yuyuan Zhao

*School of Engineering, University of Liverpool, Liverpool L69 3GH, UK*

**\*Corresponding author**

Pengcheng Zhu

School of Engineering

University of Liverpool

Liverpool L69 3GH

UK

Email: [sgpzhu@liverpool.ac.uk](mailto:sgpzhu@liverpool.ac.uk)

Tel.: 0044 (0) 7709606856

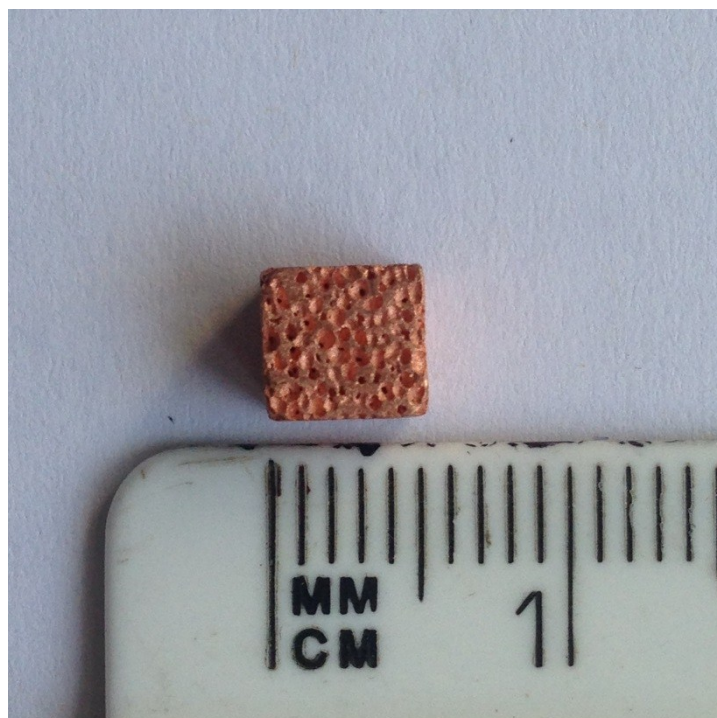

Fig. S1 The LCS porous Cu with a size of 5mm×5mm×4.8mm

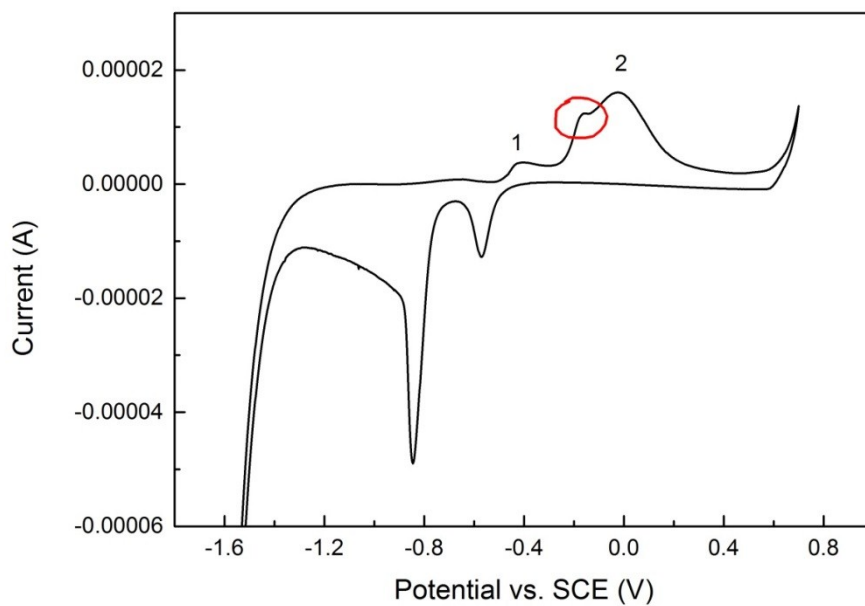

Fig. S2 The current-potential plot of a copper plate with a geometric surface area of 0.0543 cm<sup>2</sup> in 0.1 M KOH in the potential range of -1.6 to 0.7 V at a scan rate of 0.01 V/s

Another peak (marked in Fig. S2) occurs between peak 1 and peak 2 for copper plate. It is associated with the reaction below <sup>1,2</sup>:

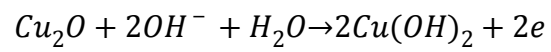

This reaction is very sensitive to measurement conditions, e.g., scan rate. It is difficult to find this peak from the current-potential plots of the LCS Cu samples.

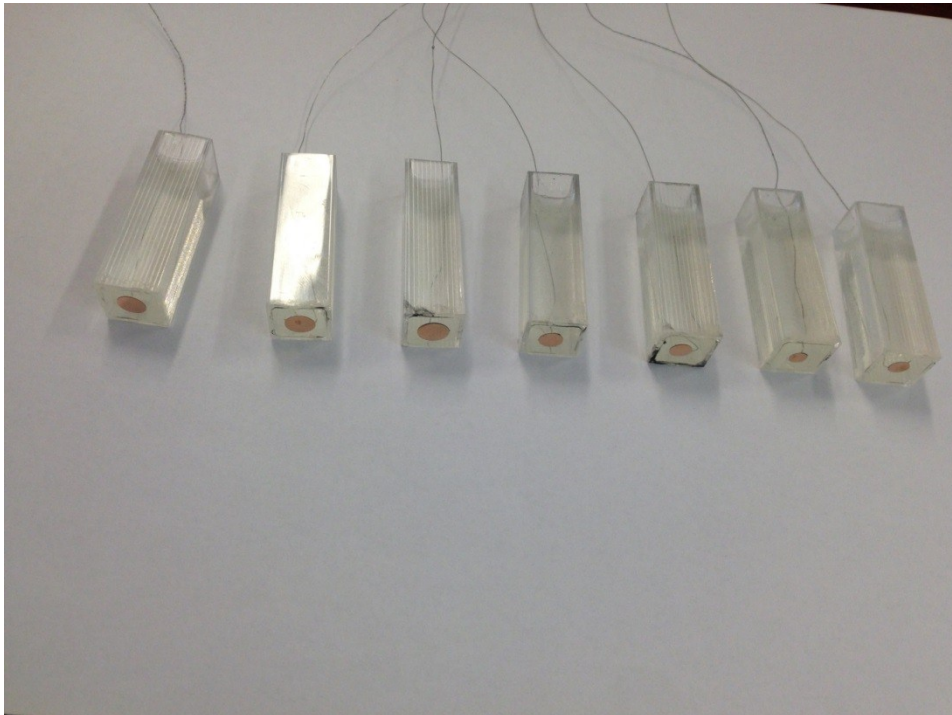

Fig. S3 Mirror polished copper plates with known geometric surface areas of 0.0543, 0.104  
0.137, 0.171, 0.211, 0.252, 0.299 cm<sup>2</sup> (from right to left)

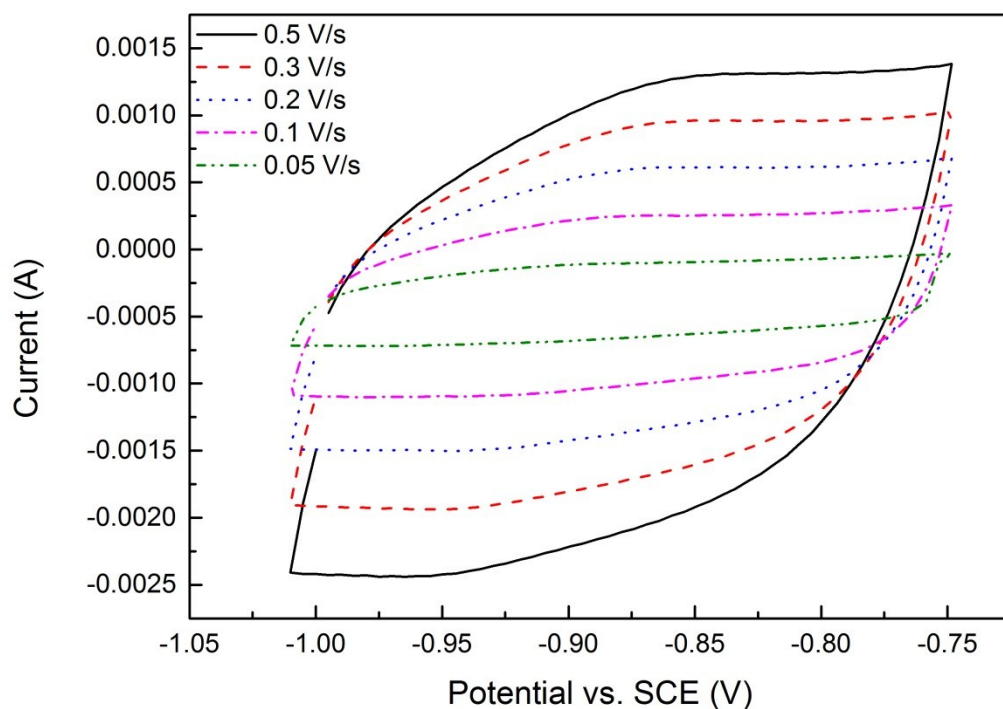

Fig. S4 Current-potential plots of the LCS Cu for real surface area measurement

Table S1  $A_{Cu^+}$  ( $cm^{-1}$ ) of the LCS Cu under different treatment conditions

|                           |          | Treatment Conditions |       |       |       |                  |       |       |       |        |       |       |       |                  |       |       |       |
|---------------------------|----------|----------------------|-------|-------|-------|------------------|-------|-------|-------|--------|-------|-------|-------|------------------|-------|-------|-------|
|                           |          | 850 °C               |       |       |       | 850 °C & Etching |       |       |       | 950 °C |       |       |       | 950 °C & Etching |       |       |       |
|                           |          | < 20                 | 20-45 | 45-75 | 75-90 | < 20             | 20-45 | 45-75 | 75-90 | < 20   | 20-45 | 45-75 | 75-90 | <20              | 20-45 | 45-75 | 75-90 |
| Particle size ( $\mu m$ ) | Porosity | 534                  | 742   | 841   | 707   | 435              | 632   | 659   | 519   | 219    | 222   | 303   | 204   | 142              | 177   | 226   | 189   |
| 0.50                      |          | 637                  | 807   | 686   | 727   | 538              | 605   | 502   | 548   | 282    | 246   | 298   | 261   | 213              | 191   | 206   | 217   |
| 0.55                      |          | 795                  | 787   | 772   | 739   | 520              | 625   | 579   | 550   | 257    | 270   | 308   | 258   | 197              | 214   | 229   | 188   |
| 0.60                      |          | 579                  | 791   | 743   | 610   | 491              | 626   | 555   | 397   | 212    | 313   | 322   | 282   | 176              | 228   | 230   | 227   |
| 0.65                      |          | 601                  | 835   | 718   | 677   | -                | -     | -     | -     | 253    | 345   | 368   | 284   | -                | -     | -     | -     |
| 0.70                      |          | 631                  | 739   | 688   | 522   | -                | -     | -     | -     | 317    | 280   | 398   | 283   | -                | -     | -     | -     |
| 0.75                      |          |                      |       |       |       |                  |       |       |       |        |       |       |       |                  |       |       |       |

Table S2  $A_{OH^-}$  ( $cm^{-1}$ ) of the LCS Cu under different treatment conditions

| Particle size<br>( $\mu m$ )<br><br>Porosity |     | Treatment Conditions |       |       |       |                  |       |       |       |        |       |       |       |                  |       |       |       |
|----------------------------------------------|-----|----------------------|-------|-------|-------|------------------|-------|-------|-------|--------|-------|-------|-------|------------------|-------|-------|-------|
|                                              |     | 850 °C               |       |       |       | 850 °C & Etching |       |       |       | 950 °C |       |       |       | 950 °C & Etching |       |       |       |
|                                              |     | < 20                 | 20-45 | 45-75 | 75-90 | < 20             | 20-45 | 45-75 | 75-90 | < 20   | 20-45 | 45-75 | 75-90 | <20              | 20-45 | 45-75 | 75-90 |
| 0.50                                         | 249 | 277                  | 369   | 262   | 208   | 246              | 337   | 288   | 123   | 144    | 191   | 130   | 101   | 133              | 181   | 165   |       |
| 0.55                                         | 270 | 296                  | 371   | 300   | 248   | 238              | 353   | 272   | 186   | 166    | 189   | 176   | 166   | 162              | 192   | 189   |       |
| 0.60                                         | 365 | 305                  | 313   | 329   | 250   | 321              | 247   | 287   | 219   | 185    | 201   | 158   | 174   | 193              | 190   | 124   |       |
| 0.65                                         | 265 | 324                  | 310   | 278   | 257   | 303              | 249   | 253   | 158   | 189    | 214   | 203   | 161   | 200              | 202   | 183   |       |
| 0.70                                         | 228 | 371                  | 326   | 343   | -     | -                | -     | -     | 201   | 179    | 252   | 235   | -     | -                | -     | -     |       |
| 0.75                                         | 299 | 332                  | 337   | 275   | -     | -                | -     | -     | 222   | 218    | 266   | 242   | -     | -                | -     | -     |       |

Table S3  $A_r$  ( $cm^{-1}$ ) of the LCS Cu under different treatment conditions

| Particle size<br>( $\mu m$ )<br><br>Porosity |      | Treatment Conditions |       |       |       |                  |       |       |       |        |       |       |       |                  |       |       |       |
|----------------------------------------------|------|----------------------|-------|-------|-------|------------------|-------|-------|-------|--------|-------|-------|-------|------------------|-------|-------|-------|
|                                              |      | 850 °C               |       |       |       | 850 °C & Etching |       |       |       | 950 °C |       |       |       | 950 °C & Etching |       |       |       |
|                                              |      | < 20                 | 20-45 | 45-75 | 75-90 | < 20             | 20-45 | 45-75 | 75-90 | < 20   | 20-45 | 45-75 | 75-90 | <20              | 20-45 | 45-75 | 75-90 |
| 0.5                                          | 1461 | 1720                 | 1615  | 1624  | 1278  | 1683             | 1462  | 1466  | 677   | 929    | 959   | 890   | 677   | 851              | 1211  | 851   |       |
| 0.55                                         | 1801 | 1878                 | 1885  | 1724  | 1456  | 1678             | 1615  | 1380  | 965   | 1166   | 1104  | 1005  | 1166  | 925              | 1341  | 1005  |       |
| 0.6                                          | 1902 | 1870                 | 1808  | 1689  | 1585  | 1675             | 1577  | 1375  | 1274  | 1006   | 1250  | 1006  | 1234  | 1200             | 1074  | 851   |       |
| 0.65                                         | 1771 | 1895                 | 1760  | 1545  | 1456  | 1727             | 1440  | 1120  | 1074  | 1144   | 1314  | 1155  | 959   | 1104             | 1115  | 1035  |       |
| 0.7                                          | 1848 | 2015                 | 1732  | 1729  | -     | -                | -     | -     | 1138  | 1341   | 1461  | 1253  | -     | -                | -     | -     |       |
| 0.75                                         | 1664 | 1909                 | 1867  | 1711  | -     | -                | -     | -     | 1407  | 1353   | 1575  | 1340  | -     | -                | -     | -     |       |

## References

1. N. Hampson, J. Lee and K. Macdonald, *Journal of Electroanalytical Chemistry and Interfacial Electrochemistry*, 1972, **34**, 91-99.
2. J. Ambrose, R. Barradas and D. Shoesmith, *Journal of Electroanalytical Chemistry and Interfacial Electrochemistry*, 1973, **47**, 47-64.
